# Supplementary material
Source: PubMed Central journal article supplement (PMC1242261)
Supplement: plntcell_tpc.105.033506_1.pdf [file plntcell_tpc.105.033506_1.pdf]

**Supplemental Table 1.-** Hybridization intensities and expression ratios of flavanone 3-hydroxylase cDNAs detected in microarray experiment comparing flower bud RNAs of isogenic lines of the *Wp* locus in soybean.

| Clone ID <sup>a</sup> | GenBank<br>Acc. No. | Intensities <sup>b</sup>   |                            |                            |                            | Expression Ratios |              |                  | Functional Annotation   |
|-----------------------|---------------------|----------------------------|----------------------------|----------------------------|----------------------------|-------------------|--------------|------------------|-------------------------|
|                       |                     | Replicate 1                |                            | Replicate 2                |                            | Line 1/Line 2     |              |                  |                         |
|                       |                     | Line 1<br>( <i>Wp/Wp</i> ) | Line 2<br>( <i>wp/wp</i> ) | Line 1<br>( <i>Wp/Wp</i> ) | Line 2<br>( <i>wp/wp</i> ) | Rep 1             | Rep 2        | Ave <sup>c</sup> |                         |
|                       |                     | Cy 5                       | Cy3                        | Cy3                        | Cy5                        |                   |              |                  |                         |
| Gm-c1019-2646         | AW277481            | 5416                       | 954                        | 2684                       | 1017                       | 5.677             | 2.639        | 4.110            | Flavanone 3-hydroxylase |
| Gm-c1019-2646         | AW277481            | 3943                       | 795                        | 4580                       | 1422                       | 4.960             | 3.221        | 3.844            | Flavanone 3-hydroxylase |
| Gm-c1019-2646         | AW277481            | 3835                       | 819                        | 4867                       | 1725                       | 4.683             | 2.821        | 3.421            | Flavanone 3-hydroxylase |
| Gm-c1019-2646         | AW277481            | 3886                       | 880                        | 4155                       | 1140                       | 4.416             | 3.645        | 3.981            | Flavanone 3-hydroxylase |
| Gm-c1019-2646         | AW277481            | 4108                       | 977                        | 5216                       | 2169                       | 4.205             | 2.400        | 2.964            | Flavanone 3-hydroxylase |
| Gm-c1012-683          | AI900038            | 8331                       | 2163                       | 2976                       | 992                        | 3.852             | 3.000        | 3.584            | Flavanone 3-hydroxylase |
| Gm-c1012-683          | AI900038            | 8206                       | 2156                       | 5275                       | 2494                       | 3.806             | 2.115        | 2.899            | Flavanone 3-hydroxylase |
| Gm-c1012-683          | AI900038            | 4821                       | 1282                       | 3243                       | 1473                       | 3.761             | 2.202        | 2.927            | Flavanone 3-hydroxylase |
| Gm-c1019-2646         | AW277481            | 4091                       | 1200                       | 3531                       | 141                        | 3.409             | d            | 5.684            | Flavanone 3-hydroxylase |
| Gm-c1012-683          | AI900038            | 6121                       | 1822                       | 3747                       | 986                        | 3.359             | 3.800        | 3.514            | Flavanone 3-hydroxylase |
| Gm-c1012-683          | AI900038            | 5204                       | 1614                       | 3007                       | 1295                       | 3.224             | 2.322        | 2.823            | Flavanone 3-hydroxylase |
| Gm-c1012-683          | AI900038            | 6226                       | 2390                       | 5599                       | 1379                       | 2.605             | 4.060        | 3.137            | Flavanone 3-hydroxylase |
| Gm-c1019-2646         | AW277481            | 3977                       | 906                        | 2461                       | 1339                       | 4.390             | 1.838        | 2.868            | Flavanone 3-hydroxylase |
| Gm-c1019-2646         | AW277481            | 4011                       | 955                        | 2640                       | 731                        | 4.200             | 3.611        | 4.200            | Flavanone 3-hydroxylase |
| Gm-c1012-683          | AI900038            | 5979                       | 2004                       | 2000                       | 1046                       | 2.984             | 1.912        | 2.616            | Flavanone 3-hydroxylase |
| Gm-c1012-683          | AI900038            | 4102                       | 1409                       | 3210                       | 2279                       | 2.911             | 1.409        | 1.983            | Flavanone 3-hydroxylase |
| <b>Mean ratio</b>     |                     |                            |                            |                            |                            | <b>3.902</b>      | <b>2.733</b> | <b>3.409</b>     |                         |

- (a) Both clone IDs represent the same F3H sequence except Gm-c1012-683 is 60 bases longer at the 5' end than the Gm-c-1019-2646.
- (b) Intensities after background subtraction and global normalization between replicates and within each slide are shown.
- (c) The average ratio of both microarray slides is calculated as follows:  

$$\frac{(\text{Line 1 Rep 1 intensity} + \text{Line 1 Rep2 intensity})}{(\text{Line 2 Rep 1 intensity} + \text{Line2 Rep 2 intensity})}$$
- (d) Aberrant expression ratio eliminated from the analysis.
