# Supplementary material
Source: PubMed Central journal article supplement (PMC1242261)
Supplement: plntcell_tpc.105.033506_2.pdf [file plntcell_tpc.105.033506_2.pdf]

**Supplemental Table 2.-** Hybridization intensities and expression ratios of flavanone 3-hydroxylase cDNAs detected in a second microarray experiment comparing younger flower bud RNAs of isogenic lines of the *Wp* locus in soybean.

| Clone ID <sup>a</sup> | GenBank<br>Acc. No. | Intensities <sup>b</sup>   |                            |                            |                            | Expression Ratios |              |                  | Functional Annotation   |
|-----------------------|---------------------|----------------------------|----------------------------|----------------------------|----------------------------|-------------------|--------------|------------------|-------------------------|
|                       |                     | Replicate 1                |                            | Replicate 2                |                            | Line 1/Line 2     |              |                  |                         |
|                       |                     | Line 1<br>( <i>Wp/Wp</i> ) | Line 2<br>( <i>wp/wp</i> ) | Line 1<br>( <i>Wp/Wp</i> ) | Line 2<br>( <i>wp/wp</i> ) | Rep 1             | Rep 2        | Ave <sup>c</sup> |                         |
|                       |                     | Cy 5                       | Cy3                        | Cy3                        | Cy5                        |                   |              |                  |                         |
| Gm-c1012-683          | AI900038            | 425                        | 111                        | 332                        | 195                        | 3.829             | 1.703        | 2.474            | Flavanone 3-hydroxylase |
| Gm-c1012-683          | AI900038            | 347                        | 155                        | 258                        | 160                        | 2.239             | 1.613        | 1.921            | Flavanone 3-hydroxylase |
| Gm-c1019-2646         | AW277481            | 781                        | 368                        | 159                        | 95                         | 2.122             | 1.674        | 2.030            | Flavanone 3-hydroxylase |
| Gm-c1019-2646         | AW277481            | 292                        | 102                        | 236                        | 78                         | 2.863             | 3.026        | 2.933            | Flavanone 3-hydroxylase |
| Gm-c1019-2646         | AW277481            | 323                        | 97                         | 196                        | 62                         | 3.330             | 3.161        | 3.264            | Flavanone 3-hydroxylase |
| Gm-c1019-2646         | AW277481            | 368                        | 78                         | 216                        | 67                         | 4.718             | 3.224        | 4.028            | Flavanone 3-hydroxylase |
| Gm-c1012-683          | AI900038            | 455                        | 131                        | 220                        | 123                        | 3.473             | 1.789        | 2.657            | Flavanone 3-hydroxylase |
| Gm-c1012-683          | AI900038            | 412                        | 116                        | 209                        | 123                        | 3.552             | 1.699        | 2.598            | Flavanone 3-hydroxylase |
| Gm-c1019-2646         | AW277481            | 209                        | 82                         | 183                        | 68                         | 2.549             | 2.691        | 2.613            | Flavanone 3-hydroxylase |
| Gm-c1019-2646         | AW277481            | 266                        | 93                         | 166                        | 72                         | 2.860             | 2.306        | 2.618            | Flavanone 3-hydroxylase |
| Gm-c1012-683          | AI900038            | 282                        | 120                        | 283                        | 145                        | 2.350             | 1.952        | 2.132            | Flavanone 3-hydroxylase |
| Gm-c1019-2646         | AW277481            | 252                        | 147                        | 202                        | 67                         | 1.714             | 3.015        | 2.121            | Flavanone 3-hydroxylase |
| Gm-c1019-2646         | AW277481            | 242                        | 119                        | 219                        | 62                         | 2.034             | 3.532        | 2.548            | Flavanone 3-hydroxylase |
| <b>(d)</b>            |                     |                            |                            |                            |                            |                   |              |                  |                         |
| <b>(d)</b>            |                     |                            |                            |                            |                            |                   |              |                  |                         |
| <b>(d)</b>            |                     |                            |                            |                            |                            |                   |              |                  |                         |
| <b>Mean ratio</b>     |                     |                            |                            |                            |                            | <b>2.894</b>      | <b>2.414</b> | <b>2.610</b>     |                         |

- (a) Both clone IDs represent the same F3H sequence except Gm-c1012-683 is 60 bases longer at the 5' end than the Gm-c-1019-2646
- (b) Intensities after background subtraction and global normalization between replicates and within each slide are shown.
- (c) The average ratio of both microarray slides is calculated as follows:  

$$\frac{(\text{Line 1 Rep 1 intensity} + \text{Line 1 Rep2 intensity})}{(\text{Line 2 Rep 1 intensity} + \text{Line2 Rep 2 intensity})}$$
- (d) The intensities of three of the F3H cDNA spots were lower than the cutoff baseline intensity value in the global normalization analysis.
