# Supplementary material
Source: PubMed Central journal article supplement (PMC1242261)
Supplement: plntcell_tpc.105.033506_3.pdf [file plntcell_tpc.105.033506_3.pdf]

**Supplemental Table 3.-** Hybridization intensities and expression ratios of flavanone 3-hydroxylase cDNAs detected in microarray experiment comparing seed coat RNAs of isogenic lines of the *Wp* locus in soybean.

| Clone ID <sup>a</sup> | GenBank<br>Acc. No. | Intensities <sup>b</sup>   |                            |                            |                            | Expression Ratios                   |              |                  | Functional Annotation   |
|-----------------------|---------------------|----------------------------|----------------------------|----------------------------|----------------------------|-------------------------------------|--------------|------------------|-------------------------|
|                       |                     | Replicate 1                |                            | Replicate 2                |                            | Line 1/Line 2                       |              |                  |                         |
|                       |                     | Line 1<br>( <i>Wp/Wp</i> ) | Line 2<br>( <i>wp/wp</i> ) | Line 1<br>( <i>Wp/Wp</i> ) | Line 2<br>( <i>wp/wp</i> ) | ( <i>Wp/Wp</i> ) / ( <i>wp/wp</i> ) |              |                  |                         |
|                       |                     | Cy 5                       | Cy3                        | Cy3                        | Cy5                        | Rep 1                               | Rep 2        | Ave <sup>c</sup> |                         |
| Gm-c1012-683          | AI900038            | 1075                       | 280                        | 1021                       | 311                        | 3.839                               | 3.283        | 3.547            | Flavanone 3-hydroxylase |
| Gm-c1012-683          | AI900038            | 918                        | 213                        | 1011                       | 330                        | 4.310                               | 3.097        | 3.573            | Flavanone 3-hydroxylase |
| Gm-c1019-2646         | AW277481            | 909                        | 121                        | 1133                       | 151                        | 7.512                               | 7.503        | 7.507            | Flavanone 3-hydroxylase |
| Gm-c1019-2646         | AW277481            | 925                        | 141                        | 1132                       | 213                        | 6.560                               | 5.315        | 5.811            | Flavanone 3-hydroxylase |
| Gm-c1012-683          | AI900038            | 716                        | 217                        | 440                        | 177                        | 3.300                               | 2.486        | 2.934            | Flavanone 3-hydroxylase |
| Gm-c1012-683          | AI900038            | 752                        | 215                        | 592                        | 199                        | 3.498                               | 2.975        | 3.246            | Flavanone 3-hydroxylase |
| Gm-c1019-2646         | AW277481            | 860                        | 145                        | 749                        | 206                        | 5.931                               | 3.636        | 4.584            | Flavanone 3-hydroxylase |
| Gm-c1019-2646         | AW277481            | 795                        | 122                        | 823                        | 158                        | 6.516                               | 5.209        | 5.779            | Flavanone 3-hydroxylase |
| Gm-c1012-683          | AI900038            | 504                        | 146                        | 474                        | 213                        | 3.452                               | 2.225        | 2.724            | Flavanone 3-hydroxylase |
| Gm-c1012-683          | AI900038            | 508                        | 129                        | 667                        | 219                        | 3.938                               | 3.091        | 3.405            | Flavanone 3-hydroxylase |
| Gm-c1019-2646         | AW277481            | 649                        | 88                         | 724                        | 149                        | 7.375                               | 4.859        | 5.793            | Flavanone 3-hydroxylase |
| Gm-c1019-2646         | AW277481            | 548                        | 106                        | 680                        | 76                         | 5.170                               | 8.947        | 6.747            | Flavanone 3-hydroxylase |
| Gm-c1012-683          | AI900038            | 548                        | 182                        | 677                        | 209                        | 3.011                               | 3.239        | 3.133            | Flavanone 3-hydroxylase |
| Gm-c1012-683          | AI900038            | 574                        | 142                        | 771                        | 230                        | 4.042                               | 3.352        | 3.616            | Flavanone 3-hydroxylase |
| Gm-c1019-2646         | AW277481            | 946                        | 170                        | 989                        | 138                        | 5.565                               | 7.167        | 6.282            | Flavanone 3-hydroxylase |
| Gm-c1019-2646         | AW277481            | 763                        | 131                        | 973                        | 167                        | 5.824                               | 5.826        | 5.826            | Flavanone 3-hydroxylase |
| <b>Mean Ratio</b>     |                     |                            |                            |                            |                            | <b>4.990</b>                        | <b>4.513</b> | <b>4.656</b>     |                         |

(a) Both clone IDs represent the same F3H sequence except Gm-c1012-683 is 60 bases longer at the 5' end than the Gm-c-1019-2646.

(b) Intensities after background subtraction and global normalization between replicates and within each slide are shown.

(c) The average ratio of both microarray slides is calculated as follows:  
 $(\text{Line 1 Rep 1 intensity} + \text{Line 1 Rep2 intensity}) / (\text{Line 2 Rep 1 intensity} + \text{Line2 Rep 2 intensity})$
