# Supplementary material
Source: PubMed Central journal article supplement (PMC1242261)
Supplement: plntcell_tpc.105.033506_4.pdf [file plntcell_tpc.105.033506_4.pdf]

**Supplemental Table 4.** Comparison of *Glycine max* F3H amino acid sequence to other known F3H sequences.

| Plant                         | GenBank Acc. No. | No. AA | % identity | % similarity |
|-------------------------------|------------------|--------|------------|--------------|
| <i>Glycine max</i>            | AY669324         | 375    | 100        | 100          |
| <i>Prunus persica</i>         | AB097151         | 269    | 85         | 93           |
| <i>Arabidopsis thaliana</i>   | NM_114983        | 358    | 84         | 91           |
| <i>Vitis vinifera</i>         | X75965           | 364    | 80         | 88           |
| <i>Matthiola incana</i>       | X72594           | 357    | 80         | 87           |
| <i>Medicago sativa</i>        | X78994           | 357    | 79         | 90           |
| <i>Petunia hybrida</i>        | X70786           | 369    | 78         | 89           |
| <i>Callistephus chinensis</i> | X72593           | 356    | 78         | 87           |
| <i>Malus domestica</i>        | AB074486         | 365    | 78         | 87           |
| <i>Dianthus caryophyllus</i>  | X72592           | 365    | 76         | 84           |
| <i>Zea mays</i>               | U04434           | 362    | 70         | 82           |
| <i>Hordeum vulgare</i>        | X58138           | 368    | 69         | 81           |
