# Supplementary material
Source: PubMed Central journal article supplement (PMC1242261)
Supplement: plntcell_tpc.105.033506_5.pdf [file plntcell_tpc.105.033506_5.pdf]

## Supplemental Table 5

*F3H1* and *F3H2* genomic sequences alignment. *MultAlin* version 5.4.1 alignment program (Corpet, F., 1988, Nucl. Acids Res., 16 (22), 10881-10890, <http://prodes.toulouse.inra.fr/multalin/multalin.html>) was chosen to perform this alignment.

|           |             |            |            |            |            |            |
|-----------|-------------|------------|------------|------------|------------|------------|
|           | 1           |            |            |            |            | 60         |
| F3H1 .Wp  | GCATTGCATT  | CTGCTATTTA | ATTCCACTAC | GTACACGCAC | ATTCTCCTCA | AAGACAACAA |
| F3H2 .wp  | GCATTGCATT  | CTGCTATTTA | ATTCCACAAT | G-----GCAC | -----      | -----      |
| Consensus | GCATTGCATT  | CTGCTATTTA | ATTCCACaAc | G.....GCAC | .....      | .....      |
|           | 61          |            |            |            |            | 120        |
| F3H1 .Wp  | TGGCACCAAC  | AGCCAAGACT | CTGACTTACC | TGGCCAGGA  | GAAACCCTA  | GAATCGAGCT |
| F3H2 .wp  | ---CAGCTGC  | AGCCAAGACT | CTGACTTACC | TGGCCAGCA  | GAAACCCTA  | GAATCGAGCT |
| Consensus | ...CaCcaac  | AGCCAAGACT | CTGACTTACC | TGGCCAGca  | GAAaACCCTA | GAATCGAGCT |
|           | 121         |            |            |            |            | 180        |
| F3H1 .Wp  | TCGTTCCGGA  | CGAGGAGGAG | CGTCCCAAGG | TTGCCTACAA | CGAATTCAGC | GACGAGATCC |
| F3H2 .wp  | TCGTTCCGGA  | CGAGGAGGAG | CGTCCCAAGG | TTGCCTACAA | CGAATTCAGC | GACGAGATCC |
| Consensus | TCGTTCCGGA  | CGAGGAGGAG | CGTCCCAAGG | TTGCCTACAA | CGAATTCAGC | GACGAGATCC |
|           | 181         |            |            |            |            | 240        |
| F3H1 .Wp  | CAGTGATTTC  | TCTTGCCGGA | ATCGACGAGG | TGGATGGACG | CAGAAGAGAG | ATTTGTGAGA |
| F3H2 .wp  | CAGTGATTTC  | TCTTGCCGGA | ATCGACGAGG | TGGATGGACG | CAGAAGAGAG | ATTTGTGAGA |
| Consensus | CAGTGATTTC  | TCTTGCCGGA | ATCGACGAGG | TGGATGGACG | CAGAAGAGAG | ATTTGTGAGA |
|           | 241         |            |            |            |            | 300        |
| F3H1 .Wp  | AGATCGTGGA  | GGCTTGCGAG | AATTGGGGTA | TATTCCAGGT | TGTTGATCAC | GGTGTGGATC |
| F3H2 .wp  | AGATCGTGGA  | GGCTTGCGAG | AATTGGGGTA | TATTCCAGGT | CGTTGATCAC | GGTGTGGATC |
| Consensus | AGATCGTGGA  | GGCTTGCGAG | AATTGGGGTA | TATTCCAGGT | cGTTGATCAC | GGTGTGGATC |
|           | 301         |            |            |            |            | 360        |
| F3H1 .Wp  | AACAACCTCGT | GGCCGAGATG | ACCCGTCTCG | CCAAAGAGTT | CTTTGCTTTG | CCACCGGACG |
| F3H2 .wp  | AACAACCTCGT | GGCCGAGATG | ACCCGTCTCG | CCAAAGAGTT | CTTTGCTTTG | CCGCCGGACG |
| Consensus | AACAACCTCGT | GGCCGAGATG | ACCCGTCTCG | CCAAAGAGTT | CTTTGCTTTG | CCaCCGGACG |
|           | 361         |            |            |            |            | 420        |
| F3H1 .Wp  | AGAAGCTTCG  | TTTTGATATG | TCCGGCGCCA | AAAAGGGTGG | ATTCATTGTC | TCCAGCCATC |
| F3H2 .wp  | AGAAGCTTCG  | TTTTGATATG | TCCGGTGCCA | AAAAGGGTGG | ATTCATTGTC | TCCAGCCATC |
| Consensus | AGAAGCTTCG  | TTTTGATATG | TCCGGcGCCA | AAAAGGGTGG | ATTCATTGTC | TCCAGCCATC |
|           | 421         |            |            |            |            | 480        |
| F3H1 .Wp  | TCCAAGTAAA  | CATTAATTCT | TCAATATTAC | ATGTTATTTT | TCTTTACAAA | AAATAAAAAA |
| F3H2 .wp  | TCCAAGTAAA  | CATTA----- | -----      | -----TTT   | TC-----    | -----      |
| Consensus | TCCAAGTAAA  | CATTA..... | .....      | .....TTT   | TC.....    | .....      |
|           | 481         |            |            |            |            | 540        |
| F3H1 .Wp  | GAGAAGATTT  | TTAAAGTTAC | AGAAAGAGAT | ATAGAATGCT | TACTTAATGT | TAGATATCAA |
| F3H2 .wp  | -----       | -----      | -----      | -----      | -----      | -----      |
| Consensus | .....       | .....      | .....      | .....      | .....      | .....      |
|           | 541         |            |            |            |            | 600        |
| F3H1 .Wp  | TATCTCTTAA  | TTACTATCAT | AAAAGTTAGT | GACTCATTTC | TTAATTATTT | AACGAATTGC |
| F3H2 .wp  | -----       | -----      | -----      | GCCTCATTTC | TT-----    | -----      |
| Consensus | .....       | .....      | .....      | GActCATTTC | TT.....    | .....      |



|           |             |             |            |            |             |             |
|-----------|-------------|-------------|------------|------------|-------------|-------------|
|           | 1321        |             |            |            |             | 1380        |
| F3H1 .Wp  | GTATTATCCC  | TTAAATTATC  | TTTTAAGTTA | ATAAAAATAT | TATTTTAA    | AACTTTTCA   |
| F3H2 .wp  | -----       | -----       | -----      | -----      | -----       | -----CA     |
| Consensus | .....       | .....       | .....      | .....      | .....       | .....CA     |
|           | 1381        |             |            |            |             | 1440        |
| F3H1 .Wp  | TTTTAATTTT  | TATTTTAAAG  | TAGTTTTTCA | AAAAGAAAGG | AAAGCACAAAC | CTTATTTTAG  |
| F3H2 .wp  | TTTTAATTTT  | TATTTCAAAG  | TAGTTTTTCA | AAAAGAAAGG | AAAGCACAAAC | CTTATTTTAG  |
| Consensus | TTTTAATTTT  | TATTTCAAAG  | TAGTTTTTCA | AAAAGAAAGG | AAAGCACAAAC | CTTATTTTAG  |
|           | 1441        |             |            |            |             | 1500        |
| F3H1 .Wp  | AAAATATAAT  | AAATTGCATT  | TAATTTGCAA | ATAAATGTAC | CGACGAAACA  | GTTAAAAAAT  |
| F3H2 .wp  | AAAATATAAT  | AAATTGCACA  | TAATTTA-AG | GGAAATAT-- | -----       | GTT-----T   |
| Consensus | AAAATATAAT  | AAATTGCACA  | TAATTTA.Aa | agAAATaT.. | .....       | GTT.....T   |
|           | 1501        |             |            |            |             | 1560        |
| F3H1 .Wp  | TGTACAGAGT  | TAAAGACCAT  | ATATTTTGTG | CTGTGCGCGT | GTAACATATGT | TACAGCCATAG |
| F3H2 .wp  | TGTTACAGC-- | CACTGCACAC  | TTATCTT--- | ----GAGAAA | GATCCTAATC  | CCAAGCATGA  |
| Consensus | TGTaCaGa..  | cAaaGaaCAC  | aTATcTT... | ...GaGaaa  | GaaaCTAagc  | cCAacCATAa  |
|           | 1561        |             |            |            |             | 1620        |
| F3H1 .Wp  | GTTTGTGTTGT | TTCCCATGGT  | GGGGGATTTC | TTGACGCCCT | CCACCCAGA   | AGCCTTCTTA  |
| F3H2 .wp  | G--GTTTGT   | TTCCCGT---  | -----      | -----      | -----       | -----CTTA   |
| Consensus | G...GTTTGT  | TTCCCaT...  | .....      | .....      | .....       | .....CTTA   |
|           | 1621        |             |            |            |             | 1680        |
| F3H1 .Wp  | CTTTAAGCCT  | TTCTTGACAG  | AATTCTCGTG | ATTATATGTT | TTTCCTTTTG  | GTGACATAAG  |
| F3H2 .wp  | CTTTAAGCCT  | TTAAT-----  | --TTCT---- | -----      | -----       | -TGACATAAT  |
| Consensus | CTTTAAGCCT  | TTaaT.....  | ..TTCT.... | .....      | .....       | ..TGACATAAg |
|           | 1681        |             |            |            |             | 1740        |
| F3H1 .Wp  | TAGAGTACTT  | CAATTTATAT  | ATTTGATTGA | ATACATTATG | ATTATGATTT  | ATAGTGGTGC  |
| F3H2 .wp  | TATCGT----  | -----       | -----      | -----G     | ATTATGATGT  | ATAGT-----  |
| Consensus | TAgAGT....  | .....       | .....      | .....G     | ATTATGATgt  | ATAGT.....  |
|           | 1741        |             |            |            |             | 1800        |
| F3H1 .Wp  | ATTATTGCCT  | ATTTCCCTCAA | ATGTAGACAC | ACCTCTAGAA | AGTGCATGAT  | CCAACCAGAG  |
| F3H2 .wp  | -----       | -----       | -----      | -----AGAA  | AGTGCATGA-  | -----AT     |
| Consensus | .....       | .....       | .....      | .....AGAA  | AGTGCATGA.  | .....Ag     |
|           | 1801        |             |            |            |             | 1860        |
| F3H1 .Wp  | CATTAATTA   | ATTAACATGT  | GATGACAGGG | GGAATCGGTG | CAGGACTGGA  | GAGAAATAGT  |
| F3H2 .wp  | AATTTATGTA  | G--AAATAT   | GATGACAGGG | AGAGTCAGTG | CAGGACTGGA  | GAGAAATAGT  |
| Consensus | aATTAaAgTA  | a..AAaATaT  | GATGACAGGG | agAaTCaGTG | CAGGACTGGA  | GAGAAATAGT  |
|           | 1861        |             |            |            |             | 1920        |
| F3H1 .Wp  | GACATACTTT  | TCGTACCCAA  | AAAGAGAGAG | GGACTATTCA | AGGTGGCCAG  | ACACGCCAGA  |
| F3H2 .wp  | GATATACTTT  | TCGTACCCAA  | AAAGAGAGAG | GGACTATTCA | AGGTGGCCAC  | ACAAGCCAGA  |
| Consensus | GAcATACTTT  | TCGTACCCAA  | AAAGAGAGAG | GGACTATTCA | AGGTGGCCAc  | ACAaGCCAGA  |
|           | 1921        |             |            |            |             | 1980        |
| F3H1 .Wp  | AGGGTGGAGA  | TCGGTGACTG  | AGGAATACAG | CGACAAAGTA | ATGGGTCTAG  | CTTGCAAGCT  |
| F3H2 .wp  | AGGGTGGAGA  | TGGCGACTG   | AGGAATACAG | CGAGAACTA  | ATGGGTCTAG  | CTGGGAAGCT  |
| Consensus | AGGGTGGAGA  | TcGgGcACTG  | AGGAATACAG | CGAcAAAcTA | ATGGGTCTAG  | CTgGcAAGCT  |
|           | 1981        |             |            |            |             | 2040        |
| F3H1 .Wp  | CATGGAGGTG  | TTGTCCGAAG  | CAATGGGGTT | AGAGAAAGAG | GGTTTAAGCA  | AAGCATGTGT  |
| F3H2 .wp  | CATGGAGGTG  | TTGTCCGAAG  | CAATGGGGTT | AGAGAAAGAG | GGTTTAAGCA  | AAGCATGTGT  |
| Consensus | CATGGAGGTG  | TTGTCCGAAG  | CAATGGGGTT | AGAGAAAGAG | GGTTTAAGCA  | AAGCATGTGT  |

|           |                                              |                                  |            |
|-----------|----------------------------------------------|----------------------------------|------------|
|           | 2041                                         |                                  | 2100       |
| F3H1 .Wp  | TGACATGGAC CAGAAGGTGG TGGTTAATTA CTACCCCAA   | TGCCCTCAAC CTGACCTCAC            |            |
| F3H2 .wp  | TGACATGGAC CAGAAGGTGG TGGTTAATTA CTATCCCAA   | TGCCCTCAAC CTGACCTCAC            |            |
| Consensus | TGACATGGAC CAGAAGGTGG TGGTTAATTA CTAcCCCAA   | TGCCCTCAAC CTGACCTCAC            |            |
|           | 2101                                         |                                  | 2160       |
| F3H1 .Wp  | TCTTGGCCTG AAGCGCCACA CGGATCCGG CACTATCACC   | TTGCTGCTTC AGGACCAAGT            |            |
| F3H2 .wp  | TCTTGGCCTG AAGCGCCACA CGGATCCGG CACCATCACC   | TTGCTGCTTC AGGACCAAGT            |            |
| Consensus | TCTTGGCCTG AAGCGCCACA CGGATCCGG CACCATCACC   | TTGCTGCTTC AGGACCAAGT            |            |
|           | 2161                                         |                                  | 2220       |
| F3H1 .Wp  | GGGTGGACTT CAAGCCACCA GGGACAATGG CAAAACATGG  | ATCACCGTTC AGCCTGTGGA            |            |
| F3H2 .wp  | GGGTGGACTT CAAGCCACCA GGGACAATGG CAAAACATGG  | ATCACCGTTC AGCCTGTGGA            |            |
| Consensus | GGGTGGACTT CAAGCCACCA GGGACAATGG CAAAACATGG  | ATCACCGTTC AGCCTGTGGA            |            |
|           | 2221                                         |                                  | 2280       |
| F3H1 .Wp  | GGCTGCCTTC GTCGTCAATC TTGGAGATCA TGCTCATGTC  | AGTGTGCAAT TCATTCAATT            |            |
| F3H2 .wp  | GGCTGCCTTC GTTGTCAATC TTGGAGATCA TGCTCATGTC  | AGTATGCAAT TCATTCAATT            |            |
| Consensus | GGCTGCCTTC GTcGTCAATC TTGGAGATCA TGCTCATGTC  | AGTATGCAAT TCATTCAATT            |            |
|           | 2281                                         |                                  | 2340       |
| F3H1 .Wp  | TCATTTTATG GCCTTTATTC CGTTCTCAAT TTA         | TACTACAAA ATAGGATGTG TAAAAATTAC  |            |
| F3H2 .wp  | TCATTTTATG GCCTTCTCTT T-TTCTCAAT TTAGTACAAA  | ATA---CCTG TAAAAATTA-            |            |
| Consensus | TCATTTTATG GCCTTcacTc c.TTCTCAAT TTA         | cTACTACAAA ATA...cctG TAAAAATTA. |            |
|           | 2341                                         |                                  | 2400       |
| F3H1 .Wp  | TTTCGTAAAA AAAATAAAAT CTAATCCAGT TGT         | TTTTTAA TGGTTTATC CTATTCGATT     |            |
| F3H2 .wp  | -----                                        | -----A TTATTTTAA                 | ATTTTTTATT |
| Consensus | .....                                        | .....A TTagTTTAA                 | aTaTTCgATT |
|           | 2401                                         |                                  | 2460       |
| F3H1 .Wp  | TTATATTAAA ATAGTTAAAT TAATTTAAAG ATGTGTTCAA  | AATCAAAAAT GATTTTAAAA            |            |
| F3H2 .wp  | TTGATTAAA ATAGTCAAAT TGATTGATT- TTGAGATGAT   | ATTTTAAAA ATTAATTTTG             |            |
| Consensus | TTaATTAAA ATAGTcAAAT TaATTgAaa. atGaGaTcAa   | AaTcaAAAA aaTaaTaaaa             |            |
|           | 2461                                         |                                  | 2520       |
| F3H1 .Wp  | AATTAATTCT GATTTAAACC AATTTTAAAC TTATTC      | TAAA AGTTGAATTA GTTTAAAATT       |            |
| F3H2 .wp  | ATTTGAAGTA ATTTTAAAT AATTTTAAAC TGATTCCGTA   | AGTCCGATCA ATTAGAGATG            |            |
| Consensus | AaTTaAagca aaTTTaAacc AATTTTaaAAC TgATTc     | caaa AGTccaATca aTTaaAaatg       |            |
|           | 2521                                         |                                  | 2580       |
| F3H1 .Wp  | GATTTTCAA TTATTTTTT TCAAATAAAA AAAATATTCA    | AATAAAAGCT AGTTTGATTA            |            |
| F3H2 .wp  | AATTTTAAA TTATTTTTT T-AAATAAAA AAAATGTTCA    | AGTGAAAATT AATTAGATTC            |            |
| Consensus | aATTTTcAAA TTATTTTTT T.AAATAAAA AAAATaTTCA   | AaTaAAAact AaTTaGATTA            |            |
|           | 2581                                         |                                  | 2640       |
| F3H1 .Wp  | ACAATT---- TTATTTAAAT AATTCAAAT AACTGAATTA   | ATTTTATAAA ATAATATACT            |            |
| F3H2 .wp  | ACCAAACCTGA TTATTGAAAT GATTCAAATA ATC-GAATTG | ATTTTATAAA ATAATAT---            |            |
| Consensus | ACaAaa.... TTATTgAAAT aATTCAAATa AaC.GAATTa  | ATTTTATAAA ATAATAT...            |            |
|           | 2641                                         |                                  | 2700       |
| F3H1 .Wp  | CTTTTTTTTC TTAATTAAT TCAA-AAAA ATCAATTTAA    | TTTAGATTTA ATTATAATAT            |            |
| F3H2 .wp  | -----TTTTT TAAATTTAAT TCGAGAAAA AACAATTTAA   | TTTAGATTTA ATT-----              |            |
| Consensus | .....TTTTc TaaAaTTAAT TCaa.AAAAA AaCAATTTAA  | TTTAGATTTA ATT.....              |            |
|           | 2701                                         |                                  | 2760       |
| F3H1 .Wp  | GATTTAATTC AAATGGATTT TTTTCCAC CCTATATGTT    | TTTT-ATCAG TGATATTATT            |            |
| F3H2 .wp  | -----C AAATGGATTT TTT--CACAC CCTATATGTT      | TTTTTATCAC TGATATTAAT            |            |
| Consensus | .....C AAATGGATTT TTT..CaCAC CCTATATGTT      | TTTT.ATCac TGATATTAAT            |            |

2761 2820  
 F3H1 . Wp AACTA----- TATATATATC AGCCAGTGAT ATGTTTTTAT TAGTTAATTA AAATAAAAAAT  
 F3H2 . wp AATCAATAAC TATATATATC AGCGAATGAT ATGTTTTTAT TAGTTAATTA AAATAAAAAAT  
 Consensus AAcCA..... TATATATATC AGCcAaTGAT ATGTTTTTAT TAGTTAATTA AAATAAAAAAT

2821 2880  
 F3H1 . Wp ATTGAGATGT GAAGGGAAGT TCAAGAAGCT TTTAGAAAGA CTAGCCAGCT TAGCA----A  
 F3H2 . wp ATTGAGATGT AAAGGGAAGT TCAAGAAGCT TTTAGAAAGA CTAGCTAGCT TAGTACGTAA  
 Consensus ATTGAGATGT aAAGGGAAGT TCAAGAAGCT TTTAGAAAGA CTAGCcAGCT TAGCa.....A

2881 2940  
 F3H1 . Wp TTGATTTTAT TTATTTTTAT GAAGCAGCAA GTCTATT-GG TTTGACCGTG TACTTTGTTT  
 F3H2 . wp TTGATTTTAT TTATTTTTAT GAAGCAGCAA GTCTATTGG TTTGACCGTG TACTTTGTTT  
 Consensus TTGATTTTAT TTATTTTTAT GAAGCAGCAA GTCTATT.GG TTTGACCGTG TACTTTGTTT

2941 3000  
 F3H1 . Wp TTCATAATTT AAATTTGTTC ATTTTTTTGT GGTGGGTGCA CATGAATGCA GTATCTGAGC  
 F3H2 . wp TTCATAATTT AAATTTGTTC ATTTTTTTGT GGTGGGTGCA --TGAATGCA GTATCTGACC  
 Consensus TTCATAATTT AAATTTGTTC ATTTTTTTGT GGTGGGTGCA . .TGAATGCA GTATCTGACC

3001 3060  
 F3H1 . Wp AATGGAAGGT TCAAGAATGC TGATCACCAA GCGGTGGTGA ACTCAAACA TAGCCGTTTG  
 F3H2 . wp AATGGAAGGT TCAAGAATGC TGATCACCAA GCGGTGGTGA ACTCAAATCA TAGCCGTTTG  
 Consensus AATGGAAGGT TCAAGAATGC TGATCACCAA GCGGTGGTGA ACTCAAACA TAGCCGTTTG

3061 3120  
 F3H1 . Wp TCCATAGCCA CTTTTCAAAA CCCAGACCA AATGCAACTG TTTACCCTCT GAAGATAAGA  
 F3H2 . wp TCCATAGCCA CGTTTTCAAAA CCCAGACCA AATGCAACTG TTTACCCTCT GAAGATAAGA  
 Consensus TCCATAGCCA CgTTTTCAAAA CCCAGACCA AATGCAACTG TTTACCCTCT GAAGATAAGA

3121 3180  
 F3H1 . Wp GAAGGAGAGA AGCCTGTGAT GGAGGAACCA ATCACTTTTG CTGAAATGTA CAGGAGGAAG  
 F3H2 . wp GAGGGAGAGA AGCCTGTGAT GGAGGAACCA ATCACTTTTG CTGAAATGTA CAGGAGGAAG  
 Consensus GAaGGAGAGA AGCCTGTGAT GGAGGAACCA ATCACTTTTG CTGAAATGTA CAGGAGGAAG

3181 3240  
 F3H1 . Wp ATGAGCAAGG ACATTGAGAT TGCAAGGATG AAGAAGCTGG CTAAGGAAAA GCATTTGCAG  
 F3H2 . wp ATGAGCAAGG ACCTTGAGAT TGCAAGGATG AAGAAGCTGG CTAAGGAAAA TCATTTGCAG  
 Consensus ATGAGCAAGG ACaTTGAGAT TGCAAGGATG AAGAAGCTGG CTAAGGAAAA gCATTTGCAG

3241 3300  
 F3H1 . Wp GACCTTGAGA ATGAAAAGCA TTTGCAAGAA CTTGATCAGA AGGCAAACCT TGAGGCCAAG  
 F3H2 . wp GACCTTGAGA ACGAAAAGCA TTTGCAAGAA CTTGATCAGA AGGCAAACCT TGAGGCCAAG  
 Consensus GACCTTGAGA AcGAAAAGCA TTTGCAAGAA CTTGATCAGA AGGCAAACCT TGAGGCCAAG

3301 3360  
 F3H1 . Wp CCTTTGAAGG AGATTCTTGC TTAATTAATA ATAATTACAT ATGTATCATT TGCATGCCCC  
 F3H2 . wp CCTTTGAAGG AGATTCTTGC TTAATTAATA ATAATTACAT ATGTATCATT TGCATGCCCC  
 Consensus CCTTTGAAGG AGATTCTTGC TTAATTAATA ATAATTACAT ATGTATCATT TGCATGCCCC

3361 3420  
 F3H1 . Wp CTTGGTGTTT TTAGTATTTT TTAAGGGCCA TGAATTAATA ATAGTCCTTA CCTTTGTGCT  
 F3H2 . wp CTTGGTGTTT TTAGTGTTTT TTAAGGGCCG TGAATTAATA ATAACCCTTA ACTTTGTGCT  
 Consensus CTTGGTGTTT TTAGTaTTTT TTAAGGGCCa TGAATTAATA ATAacCCTTA aCTTTGTGCT

3421 3480  
 F3H1 . Wp TTTGTACGTC TTATGATTTA TCCTTTGTGG GGATATCATG TGTGTGTTC AGTTGCCTAT  
 F3H2 . wp TTTGTACATC TTATGGTTTA TCCTTTGTGG GGATATCATG TGTGTGTTC AGTTGCCTGT  
 Consensus TTTGTACaTC TTATGaTTTA TCCTTTGTGG GGATATCATG TGTGTGTTC AGTTGCCTAT

```
3481                                     3540
F3H1.Wp  GTCTTATTAG CTAGCTGGCT CATCTATGTA TACCTTATAT TTGCCTCTAT TATAAATGAA
F3H2.wp  GTCATATTAG CTAGCTAGCT TATCTATGTA TACCTTATAT TTGCCTCTAT TATAAATGAA
Consensus GTCaTATTAG CTAGCTaGCT cATCTATGTA TACCTTATAT TTGCCTCTa TATAAATGAA

3541                                     3562
F3H1.Wp  AATAAGTGGC ACTGTCTTTA TA
F3H2.wp  AATAAGTGGC ACTGTCTTTA T-
Consensus AATAAGTGGC ACTGTCTTTA T.
```
