# Supplementary material
Source: PubMed Central journal article supplement (PMC1242261)
Supplement: plntcell_tpc.105.033506_6.pdf [file plntcell_tpc.105.033506_6.pdf]

## Supplemental Table 6

Mutant allele *wp* (top sequence) and *Wp F3H1* (bottom sequence) genomic sequences alignment. EMBOSS pairwise alignment algorithm from EMBL-European Bioinformatics Institute (EBI) was chosen for the alignment of these two sequences differing by a large 5.7 kb insertion.

```
EMBOSS_001      1  wpTACACGCACATTCTCCTCAAAGACAACAATGGCACCAACAGCCAAGAC
|
|
|
EMBOSS_001      1  WpTACACGCACATTCTCCTCAAAGACAACAATGGCACCAACAGCCAAGAC
|
|
|
EMBOSS_001     51  TCTGACTTACCTGGCCCAGGAGAAAACCTAGAATCGAGCTTCGTTTCGGG
|
|
|
EMBOSS_001     51  TCTGACTTACCTGGCCCAGGAGAAAACCTAGAATCGAGCTTCGTTTCGGG
|
|
|
EMBOSS_001    101  ACGAGGAGGAGCGTCCCAAGGTTGCCTACAACGAATTCAGCGACGAGATC
|
|
|
EMBOSS_001    101  ACGAGGAGGAGCGTCCCAAGGTTGCCTACAACGAATTCAGCGACGAGATC
|
|
|
EMBOSS_001    151  CCAGTGATTTCTCTTGCCGGAATCGACGAGGTGGATGGACGCAGAAGAGA
|
|
|
EMBOSS_001    151  CCAGTGATTTCTCTTGCCGGAATCGACGAGGTGGATGGACGCAGAAGAGA
|
|
|
EMBOSS_001    201  GATTTGTGAGAAGATCGTGGAGGCTTGCGAGAATTGGGGTATATTCCAGG
|
|
|
EMBOSS_001    201  GATTTGTGAGAAGATCGTGGAGGCTTGCGAGAATTGGGGTATATTCCAGG
|
|
|
EMBOSS_001    251  TTGTTGATCACGGTGTGGATCAACAACCTCGTGGCCGAGATGACCCGTCTC
|
|
|
EMBOSS_001    251  TTGTTGATCACGGTGTGGATCAACAACCTCGTGGCCGAGATGACCCGTCTC
|
|
|
EMBOSS_001    301  GCCAAAGAGTTCTTTGCTTTGCCACCGGACGAGAAGCTTCGTTTTGATAT
|
|
|
EMBOSS_001    301  GCCAAAGAGTTCTTTGCTTTGCCACCGGACGAGAAGCTTCGTTTTGATAT
|
|
|
EMBOSS_001    351  GTCCGGCGCCAAAAAGGGTGGATTTCATTGTCTCCAGCCATCTCCAAGTAA
|
|
|
EMBOSS_001    351  GTCCGGCGCCAAAAAGGGTGGATTTCATTGTCTCCAGCCATCTCCAAGTAA
|
|
|
EMBOSS_001    401  ACATTAATTCTTCAATATTACATGTTTATTTTCTTTACAAAAATAAAAA
|
|
|
EMBOSS_001    401  ACATTAATTCTTCAATATTACATGTTTATTTTCTTTACAAAAATAAAAA
|
|
|
EMBOSS_001    451  AGAGAAGATTTTTAAAGTTACAGAAAGAGATATAGAATGCTTACTTAATG
|
|
|
EMBOSS_001    451  AGAGAAGATTTTTAAAGTTACAGAAAGAGATATAGAATGCTTACTTAATG
|
|
|
EMBOSS_001    501  TTAGATATCAATATCTCTTAATTACTATCATAAAAGTTAGTGACTCATT
|
|
|
EMBOSS_001    501  TTAGATATCAATATCTCTTAATTACTATCATAAAAGTTAGTGACTCATT
|
|
|
EMBOSS_001    551  CTTAATTATTTAACGAATTGCTAACACTTTTTAAATAATTATGCATTTGAA
|
|
|
EMBOSS_001    551  CTTAATTATTTAACGAATTGCTAACACTTTTTAAATAATTATGCATTTGAA
```







EMBOSS\_001 2701 TATACGCGTTCTGAACCCTAAGCAAGGTCACAACCTCGAAGCTGAGTTCT  
EMBOSS\_001 2471 -----  
EMBOSS\_001 2751 TTCTACTGTGCTGCATCAACAGTTATACGACGACAATGACTGTGACCTAA  
EMBOSS\_001 2471 -----  
EMBOSS\_001 2801 AATCACCTCTGAAGAAACCCGATTCCGCATCCACCCCAGTCCCACCGCG  
EMBOSS\_001 2471 -----  
EMBOSS\_001 2851 TCGGGCGTCAAAGAGGATTTCTCCGTGCTCACCAACGACGAAGAAGAAGA  
EMBOSS\_001 2471 -----  
EMBOSS\_001 2901 AGATGTAATTGCCGGTATCCGAAATGATTTACAGAGTTAGTAGCAAGTT  
EMBOSS\_001 2471 -----  
EMBOSS\_001 2951 CAAGAACGGGATCTTCAAATCTGCGAGGCTCACTGTAACTCCTAACTTC  
EMBOSS\_001 2471 -----  
EMBOSS\_001 3001 CCAGATTGTCATCTTCTCTTCAGTCATCTACTTTTCCTCTTTTCTCTCC  
EMBOSS\_001 2471 -----  
EMBOSS\_001 3051 GATGATTGTTGGAACCTCAAAGAGCTTCTTTGATGGAACAGGTTAGTAAAA  
EMBOSS\_001 2471 -----  
EMBOSS\_001 3101 CACATTGCATTTTGAAGCTTCAGTTTCACTTTTGAGTTTCGATTCTTTCC  
EMBOSS\_001 2471 -----  
EMBOSS\_001 3151 CTCTACTCAGCGTATGTGTGCGTTTTGTGAATTTTGCAGTACGAAAAGG  
EMBOSS\_001 2471 -----  
EMBOSS\_001 3201 TTGAGAAGATAGGGTCGCGACCGGTTACCTACGAGACCATCGCGTTGA  
EMBOSS\_001 2471 -----  
EMBOSS\_001 3251 AGAAGATTGCCTCGAGCAGGAGGATGAGGGGTTCCAGCACCGCCATT  
EMBOSS\_001 2471 -----  
EMBOSS\_001 3301 CACGAGATTTCTCTTTGAAAGAAATGCAGCACAGGAACATTGTTAGGTA  
EMBOSS\_001 2471 -----  
EMBOSS\_001 3351 TATAGTATATCTGAAGAATGTGTTGGTCTGTGCAATTCATGTGCTGAGAA  
EMBOSS\_001 2471 -----

EMBOSS\_001 3401 AGAATATTATATGGACATAGTTATAGAAATTAGAAAATTTGGAAGATTTA  
EMBOSS\_001 2471 -----  
EMBOSS\_001 3451 ATGTTTCGGTGTGAGCCTCGGTGTCTCGACATGGTGTTCATTTTTGTGTTGT  
EMBOSS\_001 2471 -----  
EMBOSS\_001 3501 TTTTTGGTTCTATTATATTGTCTGACAAACCCTGCAGCTGTGAATTGTTC  
EMBOSS\_001 2471 -----  
EMBOSS\_001 3551 GTGTATGTGACATTTGGATGCATCAATAATTTTTGAACATTATCATTTTT  
EMBOSS\_001 2471 -----  
EMBOSS\_001 3601 GAGTCTGGCTGTTTATGTAAAGAAAAAAAtACGATACTTAATGTCCCTAT  
EMBOSS\_001 2471 -----  
EMBOSS\_001 3651 GTTTTCCAGTGTGCCAGCATAATACTCCCAAGGGACATAATTCTGTTTAC  
EMBOSS\_001 2471 -----  
EMBOSS\_001 3701 ACTGTTTTATAAGGTCTACTAAAAACATGCTTGTGGGGTGTATGTATGC  
EMBOSS\_001 2471 -----  
EMBOSS\_001 3751 CAATTAGGATTGAATGGCCAAGAAAACCTTGTGACTTTAGTTCCTTTAAT  
EMBOSS\_001 2471 -----  
EMBOSS\_001 3801 TATGTTGCTTCATTTAGTTCATACATTGTTGTCCTAATGTTATTTGTCTC  
EMBOSS\_001 2471 -----  
EMBOSS\_001 3851 TTAGTCATTTCTCACTATCATTGGTGTATGTGTGGAATGCAGGTTGTAG  
EMBOSS\_001 2471 -----  
EMBOSS\_001 3901 GATGTAGTGCACGATGAGAAGAGTTTGTATCTGGTACAATTGGTTTCTGA  
EMBOSS\_001 2471 -----  
EMBOSS\_001 3951 GGAAGACAAAGGTAGTTAGATAATAAATTCAAGGACTTTGTTGCAAGGT  
EMBOSS\_001 2471 -----  
EMBOSS\_001 4001 TGAAATGGTGTAAATAGTTCTAACTTCTCTATCCTTGAATTCTTGCTTCAT4  
EMBOSS\_001 2471 -----  
EMBOSS\_001 4051 TACTCTCTTTTCTAATGTGATATGTGGCATTAGAATCATTTTTCAATATTT  
EMBOSS\_001 2471 -----

EMBOSS\_001 4101 GGCTGAATACCTAGAACACTATGCAATTTGTTATAACAGTGAGGCTGGAG  
EMBOSS\_001 2471 -----  
EMBOSS\_001 4151 AACTTTATTCAAAGAAGCTTGCCAAGTTTGTGGAAAGCGTCTCAAATCA  
EMBOSS\_001 2471 -----  
EMBOSS\_001 4201 GAATGGGCTGCTTCTGTAAGCATTATCTATTGTATAGATTCAAACCTCTGC  
EMBOSS\_001 2471 -----  
EMBOSS\_001 4251 CTTTTCCCTTGAAATTCAATGCTCAAACAAAGTTAACGCTTGAAAACCTAT  
EMBOSS\_001 2471 -----  
EMBOSS\_001 4301 CCTTTTACACTTATGGCTTAGGCATTGTCTTCTAAATCTGCATATAACAT  
EMBOSS\_001 2471 -----  
EMBOSS\_001 4351 TTATGTTGAACTGTGATCCAGTGCCAATGATTATATATCATTTATAGTGA  
EMBOSS\_001 2471 -----  
EMBOSS\_001 4401 ATTTGCTAAACAGCATGTATAAGCAAGTATTAAAGGGAATGATGATTTGT  
EMBOSS\_001 2471 -----  
EMBOSS\_001 4451 GATATTTGTAACCTTCTTGTCTAGATATGGACTAGTACACTGCAACGAACA  
EMBOSS\_001 2471 -----  
EMBOSS\_001 4501 ATTCTGACAGCCACTCCAATTATTGGATTTCCCAAGGTTAGTGTCATACT  
EMBOSS\_001 2471 -----  
EMBOSS\_001 4551 TAAGTTTATGGTTGTGTACAGTCATGTTATTTATTTACAGAGAAATAGGT  
EMBOSS\_001 2471 -----  
EMBOSS\_001 4601 TGACAAATGTACACATTTTGACTIONACTATCTATATGTTAGATACAATGGC  
EMBOSS\_001 2471 -----  
EMBOSS\_001 4651 GTGCACTTGATGAGATAAACGCAGGGGTGTGTGATGGTATGGCATATGCA  
EMBOSS\_001 2471 -----  
EMBOSS\_001 4701 GAAATCAAGAAAAACATGCCAGAGGAGTATGAGTAGGTTTGCAGACTTGT  
EMBOSS\_001 2471 -----  
EMBOSS\_001 4751 AATTTTTCTCTTATTTGCAAGTTGCATGCAACTAATATGGCAGATAAAAA  
EMBOSS\_001 2471 -----

EMBOSS\_001 4801 GAAGCACAATGTGAAACTTCTCTCTTATTAATTTTTATGATACATAGATT  
EMBOSS\_001 2471 -----  
EMBOSS\_001 4851 AAAATATAATATGTCTTAGACAAATATTAACCTAAGACCTTGTAACCTAG  
EMBOSS\_001 2471 -----  
EMBOSS\_001 4901 ATTATATGACCAGGAACCATATAATATTTCTTTGGATTTATTCCTTAAAC  
EMBOSS\_001 2471 -----  
EMBOSS\_001 4951 TTTTTTAAAAATTGTTTTTAGTTCGTGAATTTTTTTTTATTTATTTTTAGT  
EMBOSS\_001 2471 -----  
EMBOSS\_001 5001 TCTTTAATTATATTTTTGTCTTGGCTTTTTTGTCTTTCTTGCAAATTTAAG  
EMBOSS\_001 2471 -----  
EMBOSS\_001 5051 CATGTCCAGCTTTTCATTTATACATTTGATGTCTTTTTATTTCTTATTTG  
EMBOSS\_001 2471 -----  
EMBOSS\_001 5101 TTGAGTTACTATTCAATCACAAAGTTGCCAATTGCAATACCAGGTATATA  
EMBOSS\_001 2471 -----  
EMBOSS\_001 5151 GGAACGGAAATCCTTATGGAATAGCTGAAGGTATTGTTTTCAGTATGCCA  
EMBOSS\_001 2471 -----  
EMBOSS\_001 5201 TGCCGATCAAAGGTAAGTTTGTCTTACTGTGTTCTTCATTCTTTTTAATTT  
EMBOSS\_001 2471 -----  
EMBOSS\_001 5251 CTAAAATTGCTTTTTATCCCTCCTGTGATGAAAGTTTTTATCCATTTGGGT  
EMBOSS\_001 2471 -----  
EMBOSS\_001 5301 GATGGTGATTATGAACTTGTCAAGGATGATTATGACACTGCGTTCTTAGC  
EMBOSS\_001 2471 -----  
EMBOSS\_001 5351 CTAAGCCAACCTTCATGTCTAAGCCTAAGCCATAGATACTAGACCACTGTA  
EMBOSS\_001 2471 -----  
EMBOSS\_001 5401 CCATGGCAGAGTACTATTTCATACGTGTTTGCATTGAACACTACATATCCT  
EMBOSS\_001 2471 -----  
EMBOSS\_001 5451 CTATGTGATATATTTAAAATTTTCATTATCATTGAATATTACTATTCAAT  
EMBOSS\_001 2471 -----



EMBOSS\_001 5501 ACAAATTATATGATTCTTGATTAATAAATTAGCTTCACAATTCATGTTTT  
EMBOSS\_001 2471 -----  
EMBOSS\_001 5551 TAAAGTTATTTTTTCATTATCATTGAAATTTGATTTGGTAACCTTGGCCT  
EMBOSS\_001 2471 -----  
EMBOSS\_001 5601 GGCCTATCTTTAGAAATGGGATGATCACCTGCAATAATTACTTCACCAT  
EMBOSS\_001 2471 -----  
EMBOSS\_001 5651 TTGCACACATATATTCACCATGTTGGTTAGATTTTTTGGATTGGAATAGTT  
EMBOSS\_001 2471 -----  
EMBOSS\_001 5701 TTGGAGAAAAAATAGCAATTAAGATATATTTAATGATATCAATTAAATA  
EMBOSS\_001 2471 -----  
EMBOSS\_001 5751 ATTATCTTTGACTTATTTTTTTGAATTTAATTGTCAAATGGTGTCTGGGGT  
EMBOSS\_001 2471 -----  
EMBOSS\_001 5801 AAGAATTTGTATAGTATGAATCATAGTAAAAAATAAATTTTTTTTTTAA  
EMBOSS\_001 2471 -----  
EMBOSS\_001 5851 TGTTGTTTGATCAAAGATTATTTTTTTTTGAAATATGAAAATTCGTAAGGT  
EMBOSS\_001 2471 -----  
EMBOSS\_001 5901 TGATGATTTTAATAACTGTTTTTTTTATACTTATTTATTGACCATATTTAT  
EMBOSS\_001 2471 -----  
EMBOSS\_001 5951 AAGTAAATTTTTTAAATATGTCGACGTGTAAGATTTTAATATTTTCAAAT  
EMBOSS\_001 2471 -----  
EMBOSS\_001 6001 ATTTTATTTGGTGGATTACGTAATAAAGGAAAGCTTTTTTAGTATTTTAGA  
EMBOSS\_001 2471 -----  
EMBOSS\_001 6051 ATATTTTATTTCAATTTTTCTGGAATTCTAGAATACTTTATTTAGTAAAA  
EMBOSS\_001 2471 -----  
EMBOSS\_001 6101 TAGTCATGACTATTTTGTACATATTCAGGTGATCACCAAATCTAAGGAAT  
EMBOSS\_001 2471 -----  
EMBOSS\_001 6151 TGGTAATGGTCTCATTCCAAGTGTACTGGATGTTAATCTACTAGATGAAG  
EMBOSS\_001 2471 -----

EMBOSS\_001 6201 TTATTCTACTAGATGAAGTTATTCAGGTACCTCCCAACACTATTGGAATT  
EMBOSS\_001 2471 -----  
EMBOSS\_001 6251 ATTTTTTTAACTTAATGCTCTTCATTTTTTTAACTTTTTTCATTTTTGACA  
EMBOSS\_001 2471 -----  
EMBOSS\_001 6301 CTTGAAGTTGCGTGTTAATGTCACATGATTCTGAATCTATGATTCTTAGA  
EMBOSS\_001 2471 -----  
EMBOSS\_001 6351 GTATGTTTAGATTTTTATAAGAACATATAAATTGATATGCTTGAAAAATA  
EMBOSS\_001 2471 -----  
EMBOSS\_001 6401 GGAGAAATACCACTGAATTGCTAGCTTGTTATTACATTAATATCTTCATA  
EMBOSS\_001 2471 -----  
EMBOSS\_001 6451 TAATGAAATCTAACTATCCTGAGGGTTTTGAAGAGCCTGTTATTGCTACT  
EMBOSS\_001 2471 -----  
EMBOSS\_001 6501 TTATTGTTATCTTTCTTAATTTTTTAACCACTTAGCTATTTTTGGTTAAAA  
EMBOSS\_001 2471 -----  
EMBOSS\_001 6551 ATAACCTTTATATTAATAAATAAATTAAATTATTAATTAATAAATTCAAATATATT  
EMBOSS\_001 2471 -----  
EMBOSS\_001 6601 TTATATACTTAGATGATTTATTTTTCTTATAATTTAGTTACAATATTTTTAT  
EMBOSS\_001 2471 -----  
EMBOSS\_001 6651 AAATTAATTCAAATAACTTTATTGTTACGTGATTTAGTTATTTAAATTT  
EMBOSS\_001 2471 -----  
EMBOSS\_001 6701 AATTCTTTTAAAGTGGGGAGATGGGTAAAGTATTTACCACTATTTTTTTT  
EMBOSS\_001 2471 -----  
EMBOSS\_001 6751 CACCATGAAGAAAGTAAAAAGAACACAGCACAAACCGAAACTAATGCTCA  
EMBOSS\_001 2471 -----  
EMBOSS\_001 6801 TGCCTTGGCATTGCTTACAAAGCACTACGTAAGTGTGAAGGACACATAT  
EMBOSS\_001 2471 -----  
EMBOSS\_001 6851 CCCAAACAGTAAATTATTTACCACTAATTTAAAGAAAGCATTTTTTTAAAT  
EMBOSS\_001 2471 -----

EMBOSS\_001 6901 GTAACCCACATTTTTTTTTTGGTAATTAATGTAACCCACATTAAATCAATG  
EMBOSS\_001 2471 -----  
EMBOSS\_001 6951 GTGAATAAACCCTTTTTTTTTTACTTTTATATGTATTTCCCATTTAAAGG  
EMBOSS\_001 2471 -----  
EMBOSS\_001 7001 AGTTAAATCCTTATTATATATAAGAAGATAAAAAATCAGAGGTGCCAAAAA  
EMBOSS\_001 2471 -----  
EMBOSS\_001 7051 TCTTGCTTAGTTACATGTTCTGAAAATCGGATACTATAATGTACCGTTTA  
EMBOSS\_001 2471 -----  
EMBOSS\_001 7101 GTTATCACAATGATTTTTTTTATATCCATAAAAGAATCAAAGTTTTAAAAA  
EMBOSS\_001 2471 -----  
EMBOSS\_001 7151 AAAATCAAAGTTGAATATCAAAAAATTTATAATAATTCACCTTATACTATA  
EMBOSS\_001 2471 -----  
EMBOSS\_001 7201 CAATTGATTGATTGAAGTACTAGACCCCTTAAGAATTGTCACAACGATTA  
EMBOSS\_001 2471 -----  
EMBOSS\_001 7251 AAAGCAATAAATAATAATTTTTTTTTAAATTGTCTAAAAATAATAATAAT  
EMBOSS\_001 2471 -----  
EMBOSS\_001 7301 TTTTTTTTGTGTTACATATGTTGGTGTCTCTCTGTAAGGGGGAATCAAAA  
EMBOSS\_001 2471 -----  
EMBOSS\_001 7351 TTAAAGTCCATAGTTGAGCATGACATGATTAGTCTTATATGGAATAAGTT  
EMBOSS\_001 2471 -----  
EMBOSS\_001 7401 AATTCAATTAATCTTTCTTTGTTAATTGGTTGATTAGGGGCTACGCCCAA  
EMBOSS\_001 2471 -----  
EMBOSS\_001 7451 ATCAGTTCTTGAACCAGTGGATGTCAAGGATGTCCTTTAGGTCACAAACT  
EMBOSS\_001 2471 -----  
EMBOSS\_001 7501 TGTATGTTAGCTTCAAATCAGTTGTAAATATTCTAAGAACCATTATTAGA  
EMBOSS\_001 2471 -----  
EMBOSS\_001 7551 TATTCTAATGGCAATTAGTTGAAACTTCTATTTATGATCATGTAAAATTG  
EMBOSS\_001 2471 -----

```

EMBOSS_001      7601 TTGCAAAAATGTAGACTATGTAAATTTTTGTATTTAAAAATGATGAGTAG
EMBOSS_001      2471 -----
EMBOSS_001      7651 TATACTTATGCTTTAAATCAATGTTTATTTAAGTTAAAGAAATTCTAACA
EMBOSS_001      2471 -----
EMBOSS_001      7701 AAAAAACAAAACACAAGCAAAAAAATAAAATTTTTTAACTAGACATACTA
EMBOSS_001      2471 -----
EMBOSS_001      7751 AGACGGTTATGGGAAAAACTGTCTTAGTATAGTCTACTTTCTACGACGGT
EMBOSS_001      2471 -----
EMBOSS_001      7801 TATCTGGATAACCGTCTTAATATAATCATATCAAGACTTTCTAAGACGGT
EMBOSS_001      2471 -----
EMBOSS_001      7851 TTTCCGAATAACCGTCTTAGAAAGTCTTAATTATATAGCCTATACTAAGA
EMBOSS_001      2471 -----
EMBOSS_001      7901 CGGTTATCTGGATATCCGTCTTAGTATAATCAACTTTTTAAGACAGTTTT
EMBOSS_001      2471 -----
EMBOSS_001      7951 TCATATAACCGTCGTAGAAAGTTGATTATACTAAGACGGGTTCAACTAAA
EMBOSS_001      2471 -----
EMBOSS_001      8001 AACCGCCTTTAATAAACGGTACATTTTTAAGACGGGTATTCAAATAATCGT
EMBOSS_001      2471 -----
EMBOSS_001      8051 CTTAGAAACCCGATTATACAAAGACGGTTCAAAACCGTCGTAGAAAGTG
EMBOSS_001      2471 -----
EMBOSS_001      8101 GCATATCATTTTTACGACACTGCGTTCTACGACGATTCAAACCGTCGTTA
EMBOSS_001      2471 -----
EMBOSS_001      8151 AATGACCCAAATAACCGACTTAAAAACCTCTTTTGTAGTAGTGTGATTT
EMBOSS_001      2471 -----TGATTT
EMBOSS_001      8201 TCAAATTATTTTTTTTCAAATAAAAAAATATTCAAATAAAAGCTAGTTT
EMBOSS_001      2477 TCAAATTATTTTTTTTCAAATAAAAAAATATTCAAATAAAAGCTAGTTT
EMBOSS_001      8251 GATTAACAATTTTATTTAAATAAATTCAAATTAAGTGAATTAATTTTATAA
EMBOSS_001      2527 GATTAACAATTTTATTTAAATAAATTCAAATTAAGTGAATTAATTTTATAA

```



```
EMBOSS_001      9001 TGTATCATTTGCATGCCCCCTTGGTGTTTTTAGTATTTTTTAAGGGCCAT
      |||
EMBOSS_001      3277 TGTATCATTTGCATGCCCCCTTGGTGTTTTTAGTATTTTTTAAGGGCCAT
      |||
EMBOSS_001      9051 GAATTAATAATAGTCCTTACCTTTGTGCTTTTGTACGTCTTATGATTTAT
      |||
EMBOSS_001      3327 GAATTAATAATAGTCCTTACCTTTGTGCTTTTGTACGTCTTATGATTTAT
      |||
EMBOSS_001      9101 CCTTTGTGGGGATATCATGTGTTGTGTTTCAGTTGCCTATGTCTTATTAGC
      |||
EMBOSS_001      3377 CCTTTGTGGGGATATCATGTGTTGTGTTTCAGTTGCCTATGTCTTATTAGC
      |||
EMBOSS_001      9151 TAGCTGGCTCATCTATGTATACCTTATATTTGCCTCTATTATAAATGAAA
      |||
EMBOSS_001      3427 TAGCTGGCTCATCTATGTATACCTTATATTTGCCTCTATTATAAATGAAA
      |||
EMBOSS_001      9201 ATAAGTGGCACTGTCTTTATA      9221
      |||
EMBOSS_001      3477 ATAAGTGGCACTGTCTTTATA      3497
```
