# Supplementary material
Source: PubMed Central journal article supplement (PMC1242261)
Supplement: plntcell_tpc.105.033506_7.pdf [file plntcell_tpc.105.033506_7.pdf]

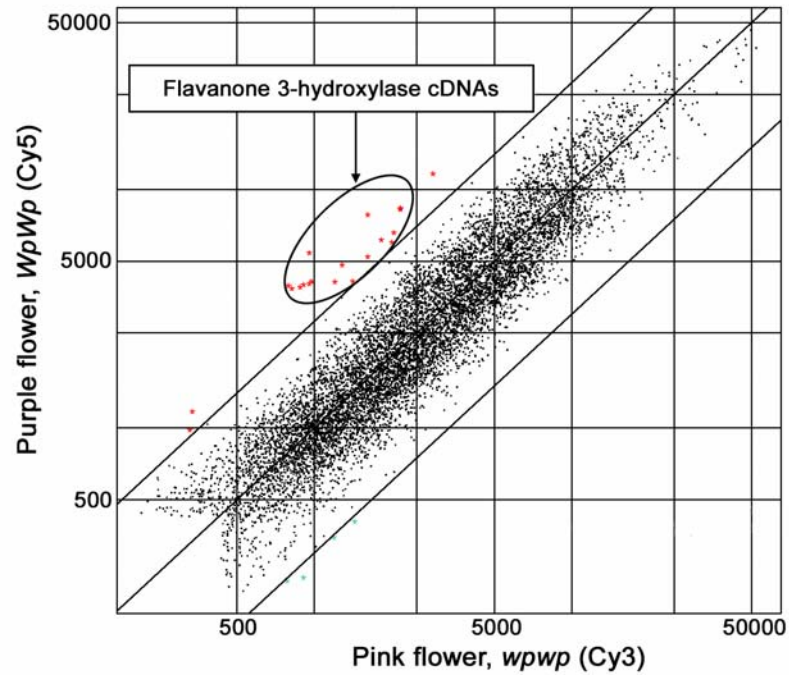

**Supplemental Figure 1.** The scatter plot of the log values of the microarray Replicate 1 intensities listed in Supplemental Table 1.

The scatter plot of the log values of hybridization intensities from a cDNA microarray slide probed with Cy5 labeled RNA from purple flower buds with the *WpWp* genotype and Cy3 labeled RNA from pink flower buds of the isogenic *wpwp* mutant line. The two outermost diagonal lines indicate expression either 2.8 higher or 0.3 lower than equivalent levels. Fifteen of the points enclosed in the oval line represent repeats of two flavanone 3-hydroxylase cDNAs on the array that are over-expressed in the *WpWp* purple flower line (Gm-c1019-683 and Gm-c1012-2646).
