# Supplementary material
Source: PubMed Central journal article supplement (PMC1242261)
Supplement: plntcell_tpc.105.033506_8.pdf [file plntcell_tpc.105.033506_8.pdf]

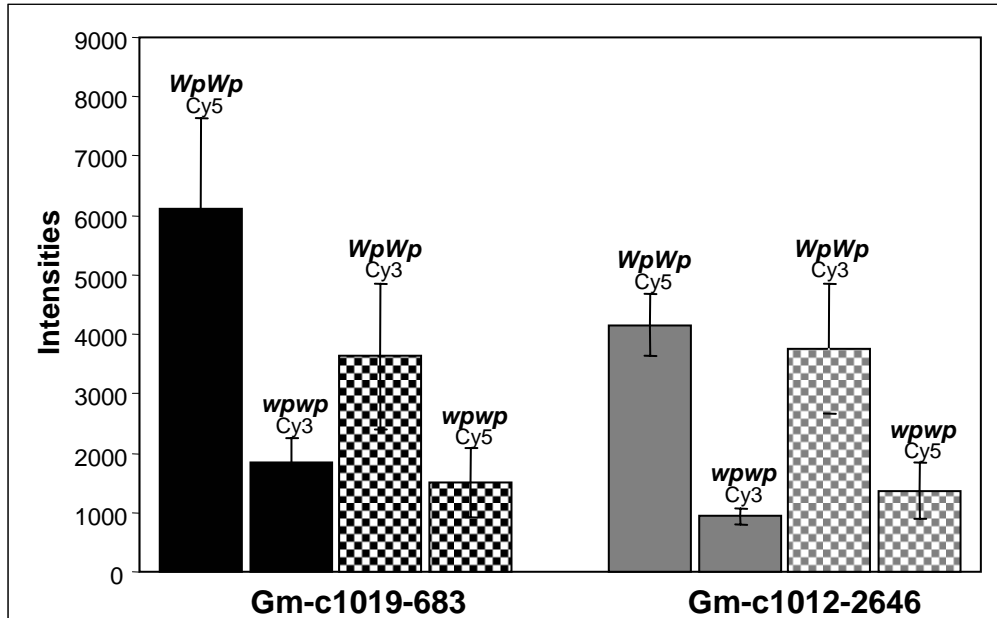

**Supplemental Figure 2.** Graphic visualization of the microarray hybridization intensities listed in Supplemental Table 1.

A bar graph representing intensity values for the two F3H cDNAs (Gm-c1019-683 and Gm-c1012-2646) hybridizing differentially to RNAs from the two isolines (*WpWp* and *wpwp*) in the two microarray experiments with the dyes Cy5 and Cy3 swapped. Solid black and gray bars represent intensities for each one of two cDNAs in the first microarray hybridization experiment and the checkered black and gray bars are intensity values for those two cDNAs in the experiment with the dyes swapped. In both experiments the cDNAs hybridized more strongly to RNAs from the *WpWp* isolate. Standard deviation of the eight intensity values represented in each bar is indicated by the error bar.
