# Supplementary material
Source: PubMed Central journal article supplement (PMC1242261)
Supplement: plntcell_tpc.105.033506_10.pdf [file plntcell_tpc.105.033506_10.pdf]

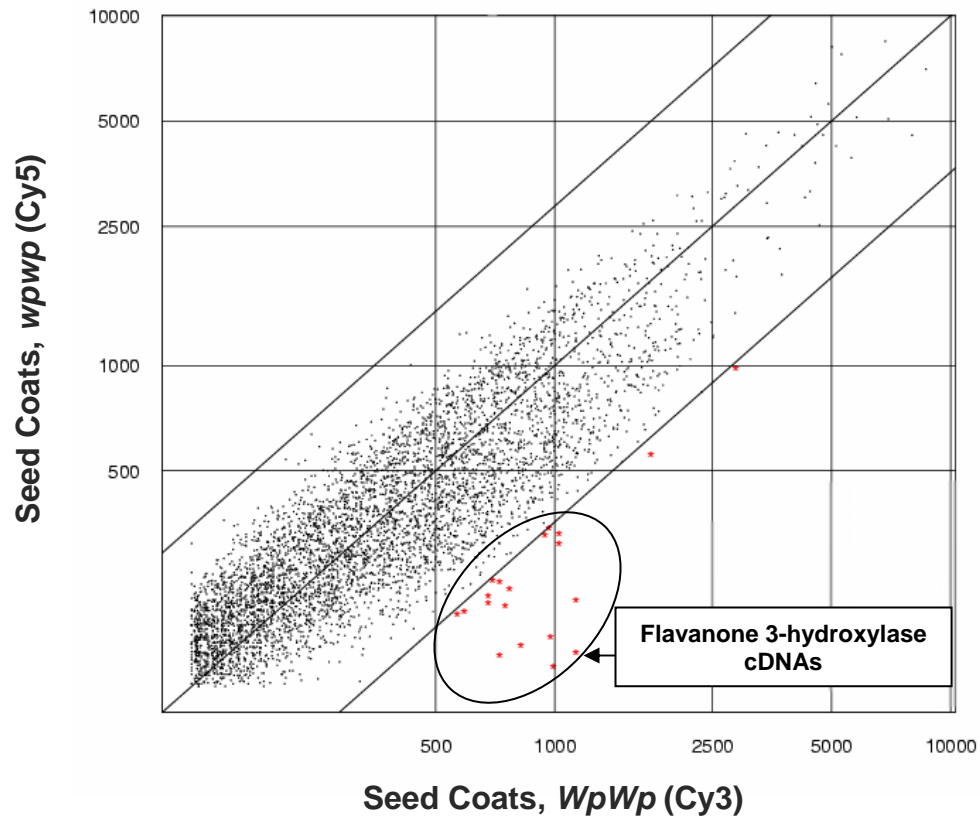

**Supplemental Figure 4.** The scatter plot of the log values of the microarray Replicate 2 intensities listed in Supplemental Table 3.

The scatter plot of the log values of hybridization intensities from a cDNA microarray replicate of the one described and which results are shown in (A) but with the dyes swapped. The Cy5 probe were RNAs from seed coats of the *wpwp* mutant line while the Cy3 probe were RNAs from seed coats of the *WpWp* isogenic line. The two outermost diagonal lines indicate expression either 2.8 higher or 0.3 lower than equivalent levels. The sixteen points enclosed in the oval line represent repeats of the two flavanone 3-hydroxylase cDNAs on the array that are over-expressed in the *WpWp* purple flower line (Gm-c1019-683 and Gm-c1012-2646
