# Supplementary material
Source: PubMed Central journal article supplement (PMC1242261)
Supplement: plntcell_tpc.105.033506_12.pdf [file plntcell_tpc.105.033506_12.pdf]

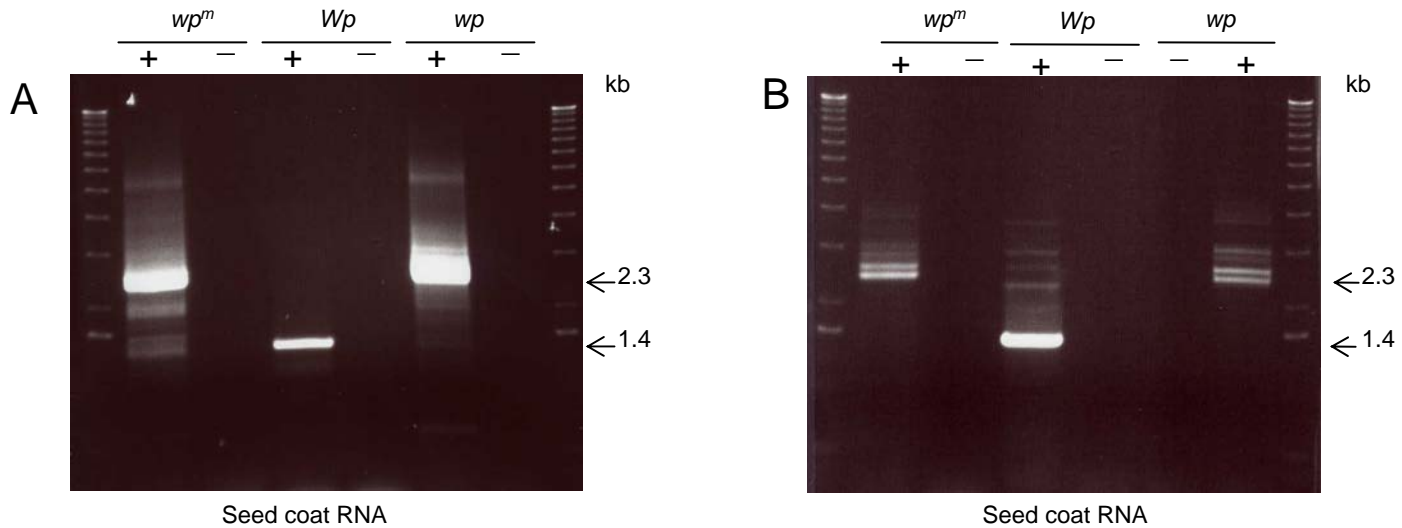

**Supplemental Figure 6.** Variant flavanone 3-hydroxylase cDNAs from LN89-5320-8-53 (*wpm*) and LN89-5322-2 (*wp*) mutant isolines.

- (A) Ethidium bromide-stained gels showing the expected ~1.4-kb cDNA amplified via RT-PCR with RNA from the LN89-5320-6 (*Wp*) line. In contrast a 2.3 kb or larger cDNAs were amplified from RNAs of the mutant isolines (*wpm* and *wp*). The (+) and (-) at top indicate reactions with and without Superscript RTII. The primers used for the PCR amplification of reverse transcribed cDNAs were the 7F and 1428R and the tissue source of the RNAs was the seed coats.
- (B) Same as (A) except for the conditions of the PCR reactions which were those that favored amplification of longer DNA fragments. The broad bands obtained from mutant line RNA samples in (A) were resolved into a group of discrete bands around that same size, 2.3 kb and larger.
